# Supplementary material for: One-step hydrothermal synthesis of Fe3O4@C nanoparticles with great performance in biomedicine
Source: Royal Society of Chemistry journal article supplement (doi:10.1039/c4tb00394b), 2014-01-01
Supplement: c4tb00394b1.pdf [file c4tb00394b1.pdf]

## **One-step hydrothermal synthesis of Fe<sub>3</sub>O<sub>4</sub>@C nanoparticles with great performance in biomedicine**

**Gui-Yun Mao<sup>a</sup>, Wen-Jing Yang<sup>b</sup>, Fan-Xing Bu<sup>a</sup>, Dong-Mei Jiang<sup>a</sup>, Zhen-Jie Zhao<sup>a</sup>,  
Qing-Hong Zhang<sup>c</sup>, Qi-Chen Fang<sup>b\*</sup>, Ji-Sen Jiang<sup>a\*</sup>**

<sup>a</sup> Department of Physics, Center for Functional Nanomaterials and Devices, East China Normal University, Shanghai 200241, P. R. China. E-mail: jsjiang@phy.ecnu.edu.cn (J. S. Jiang); Fax/Tel:+86-21-54342940

<sup>b</sup> Shanghai Diabetes Institute, Shanghai Key Laboratory of Diabetes Mellitus, Department of Endocrinology and Metabolism, Shanghai Jiao Tong University Affiliated Sixth People's Hospital, Shanghai 200233, P. R. China. E-mail: qcfang@sjtu.edu.cn (Q. C. Fang); Fax/Tel:+86-21-24058657

<sup>c</sup> Engineering Research Center of Advanced Glasses Manufacturing Technology, MOE, Donghua University, Shanghai 201620, P. R. China

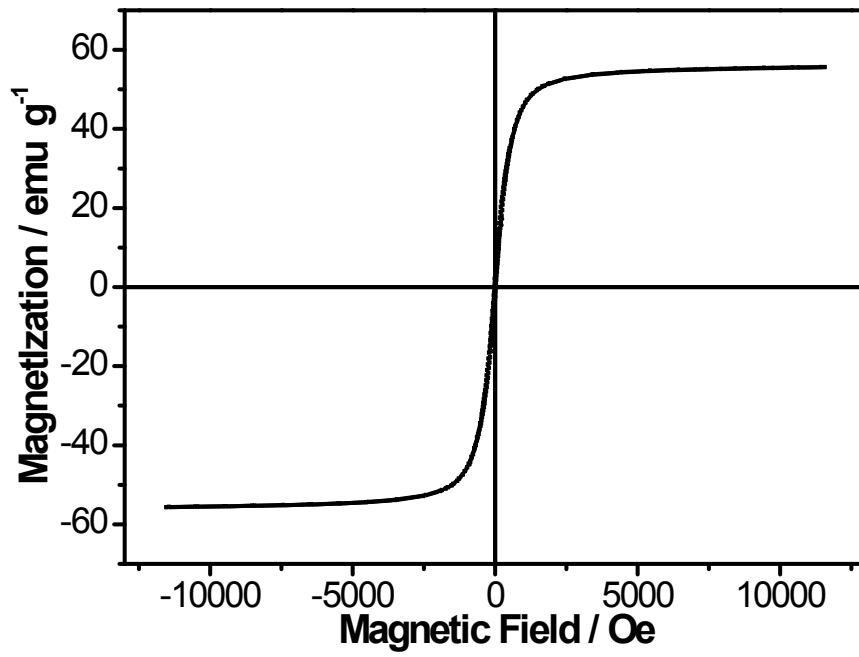

Figure S1. M-H loop of Fe<sub>3</sub>O<sub>4</sub>@C nanoparticles after drug release at pH 5.8 for 200 h.
